# Supplementary material for: 7-epi-Clusianone, a Multi-Targeting Natural Product with Potential Chemotherapeutic, Immune-Modulating, and Anti-Angiogenic Properties
Source: PubMed Central journal article supplement (PMC6930650; doi:10.3390/molecules24234415), 2019-12-03
Supplement: molecules-24-04415-s001.pdf [file molecules-24-04415-s001.pdf]

## Supplementary information

# 7-epi-clusianone, a multi-targeting natural product with potential chemotherapeutic, immune-modulating, and anti-angiogenic properties

Wesley F. Taylor<sup>1</sup>, Maria Yanez<sup>1</sup>, Sara E. Moghadam<sup>1</sup>, Mahdi Moridi Farimani<sup>2</sup>, Sara Soroury<sup>3</sup>, Samad N. Ebrahimi<sup>2</sup>, Marzieh Tabefam<sup>2</sup>, and Ehsan Jabbarzadeh<sup>1,4,\*</sup>

<sup>1</sup> Department of Chemical Engineering, University of South Carolina, Columbia, SC, 29208, USA.  
[wftaylor@email.sc.edu](mailto:wftaylor@email.sc.edu), [yanez@mailbox.sc.edu](mailto:yanez@mailbox.sc.edu), and [eslambol@mailbox.sc.edu](mailto:eslambol@mailbox.sc.edu)

<sup>2</sup> Department of Phytochemistry, Medicinal Plants and Drugs Research Institute, Shahid Beheshti University, G. C., Evin, Tehran, 19839-69411, Iran. [m\\_moridi@sbu.ac.ir](mailto:m_moridi@sbu.ac.ir); [s\\_ebrahimi@sbu.ac.ir](mailto:s_ebrahimi@sbu.ac.ir), and [m\\_tabefam@sbu.ac.ir](mailto:m_tabefam@sbu.ac.ir)

<sup>3</sup> Department of Phytochemistry, Faculty of Science, Golestan University, Gorgan, 15759-49138, Iran.  
[sarasoroury@gmail.com](mailto:sarasoroury@gmail.com)

<sup>4</sup> Biomedical Engineering Program, University of South Carolina, Columbia, SC 29208, USA

\* Correspondence: [ehsan@sc.edu](mailto:ehsan@sc.edu), Tel.: (803) 777-3297

A)

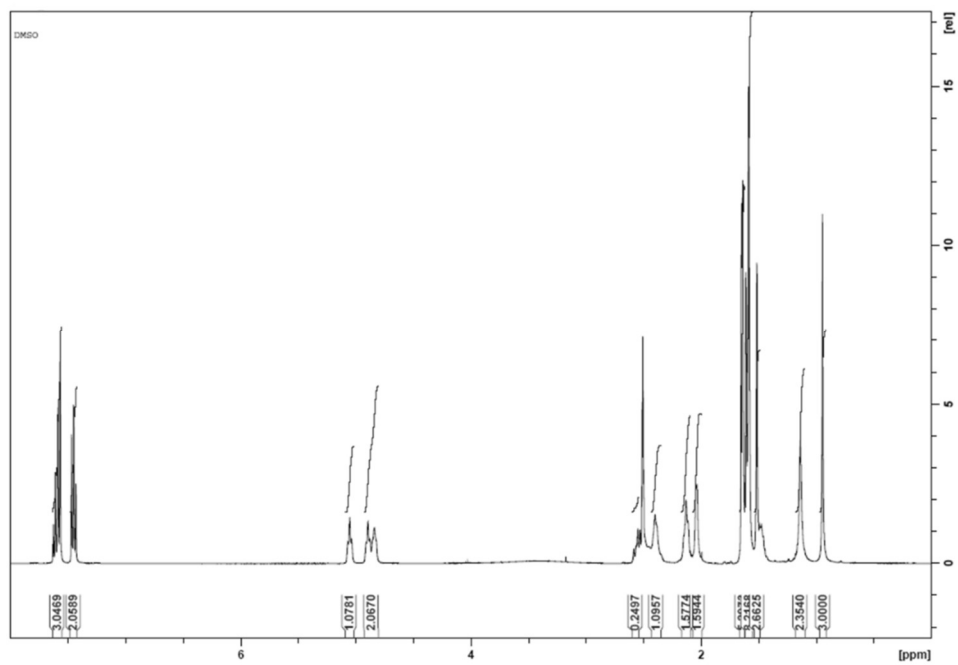

B)

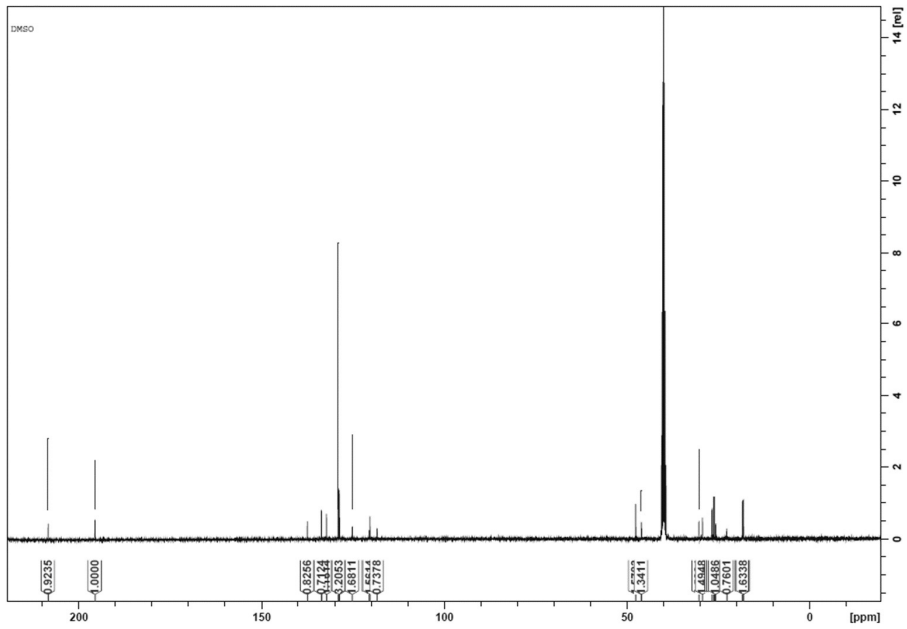

C)

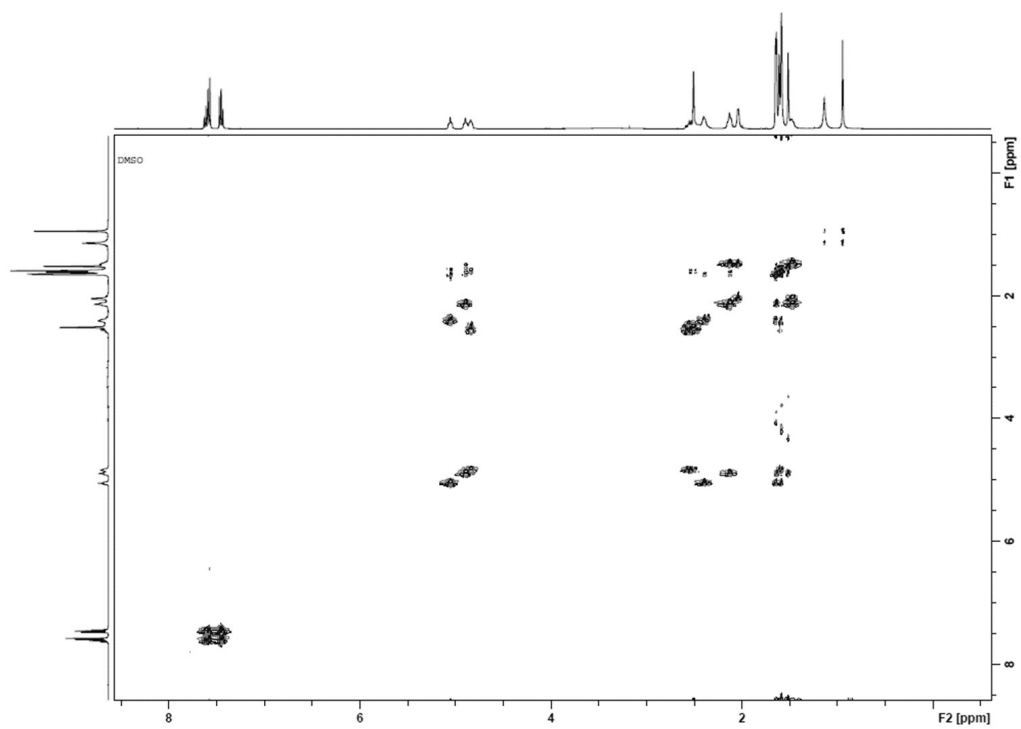

D)

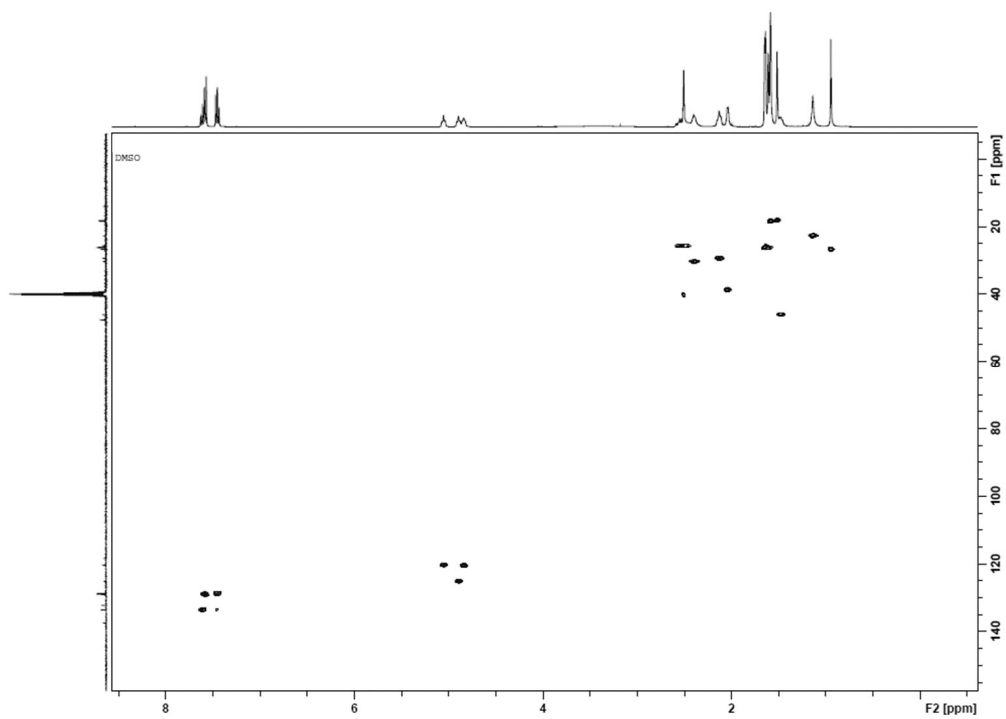

E)

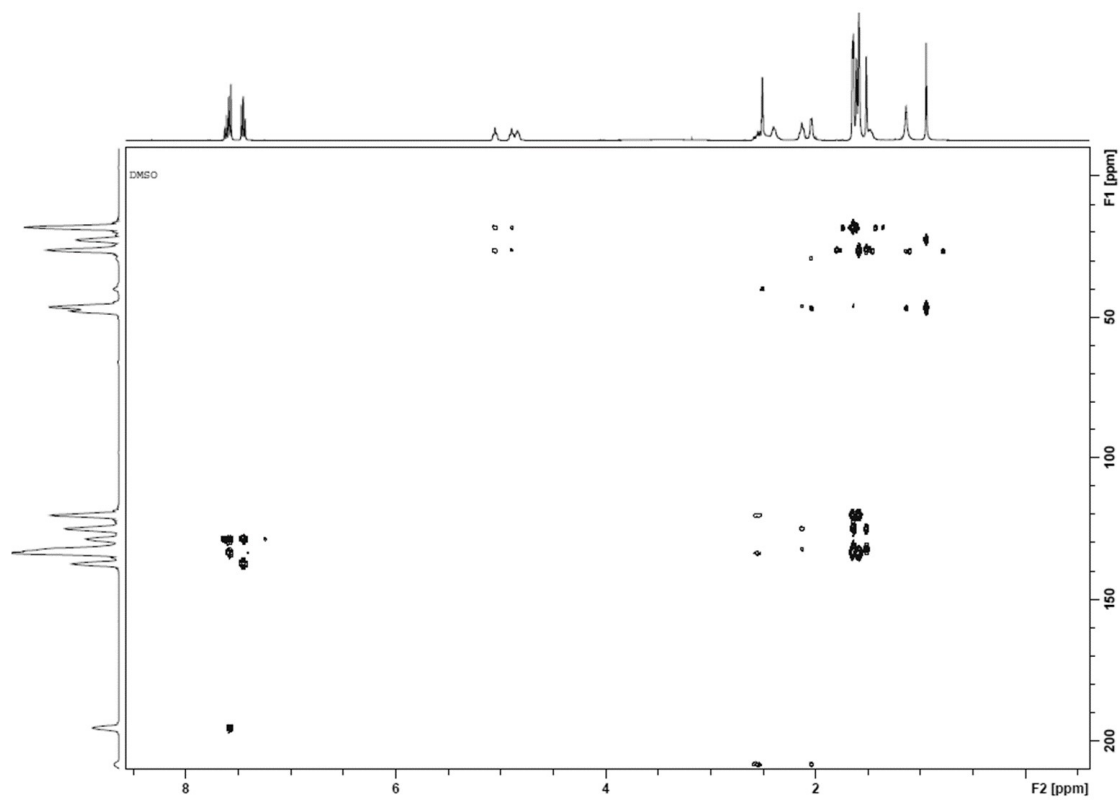

**Figure S1.** The A) <sup>1</sup>H-NMR spectrum, B) <sup>13</sup>C-NMR spectrum, C) H-H COSY spectrum, D) HSQC spectrum, and E) HMBC spectrum of 7-*epi*-clusianone in DMSO.

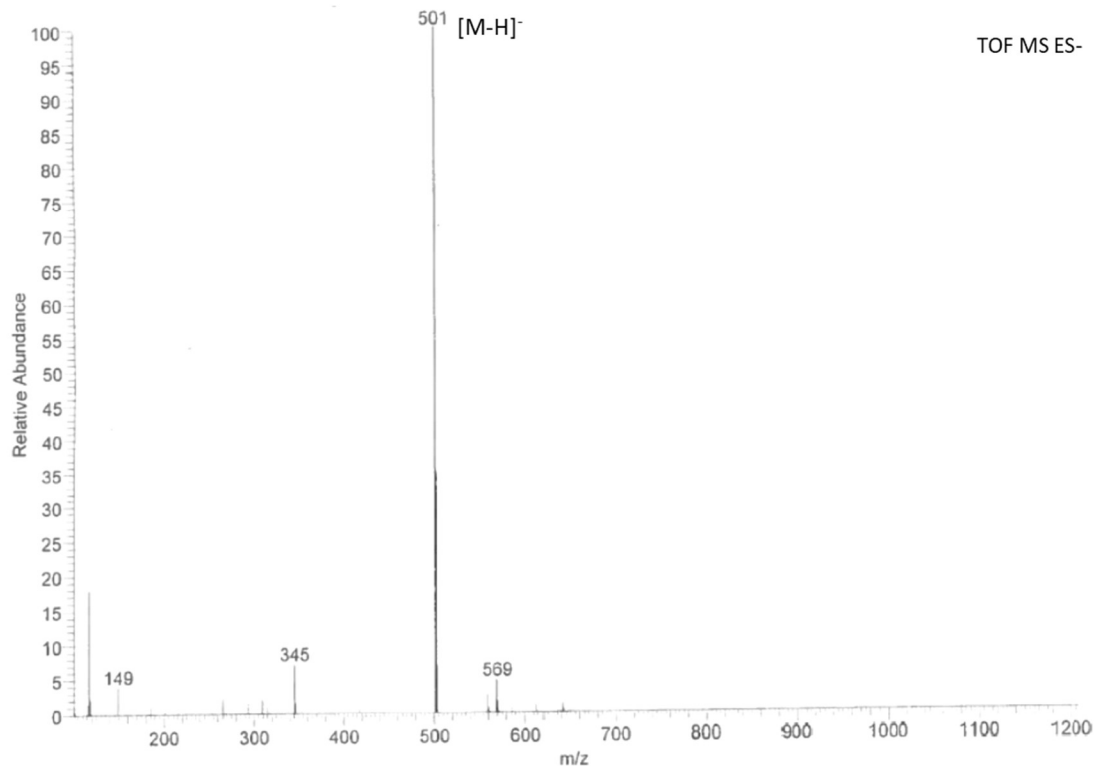

**Figure S2:** Time of flight mass spectrum determination of molecular weight for 7-*epi*-clusianone.

A)

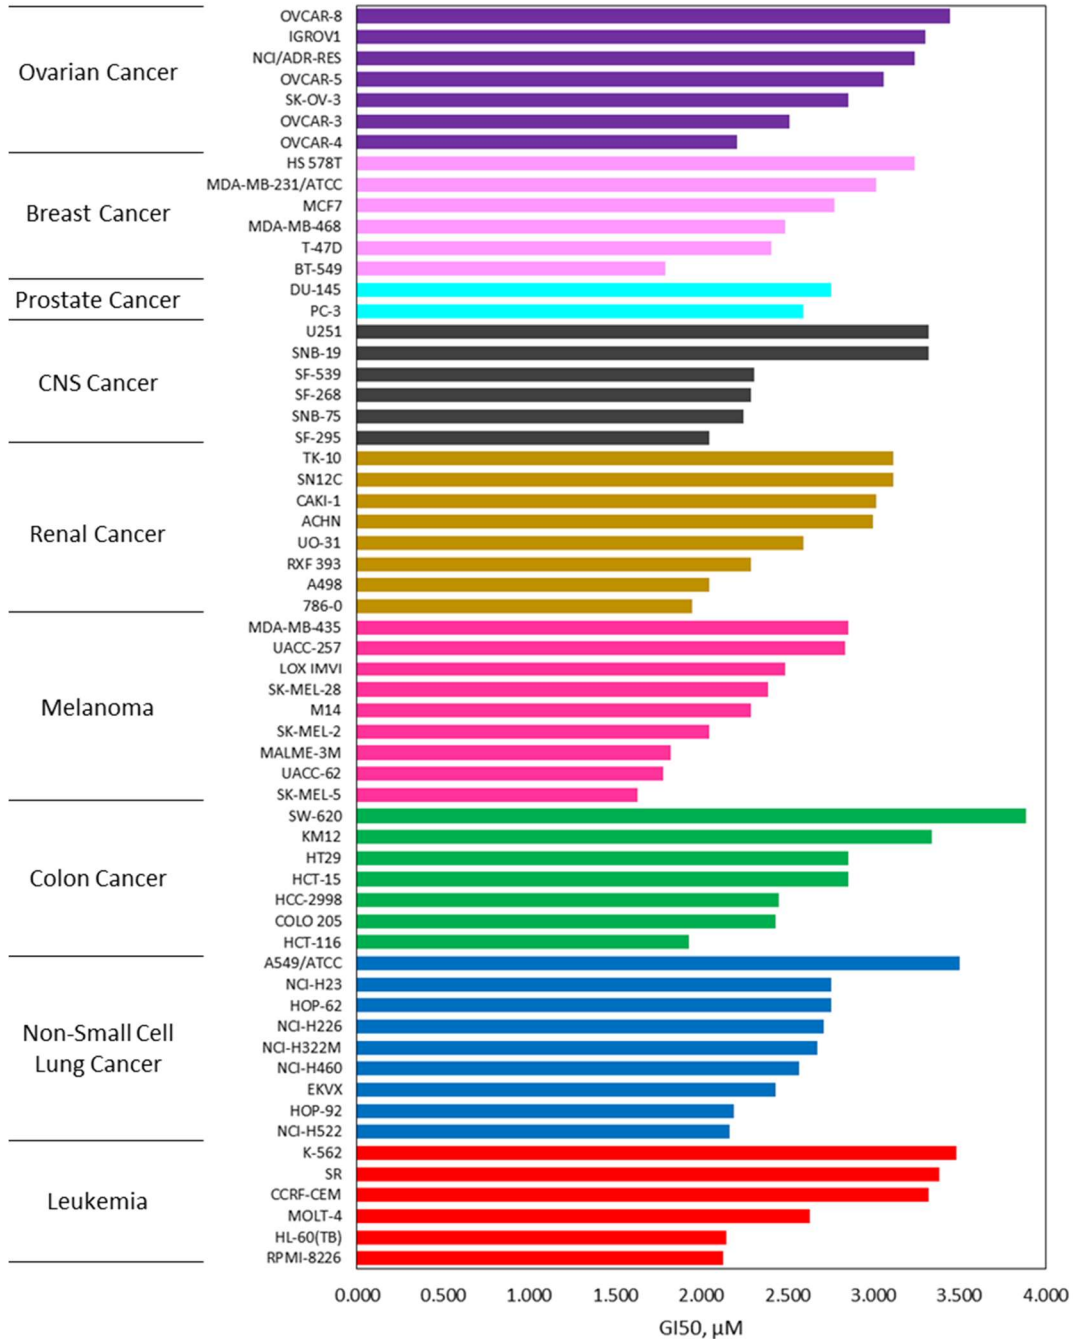

B)

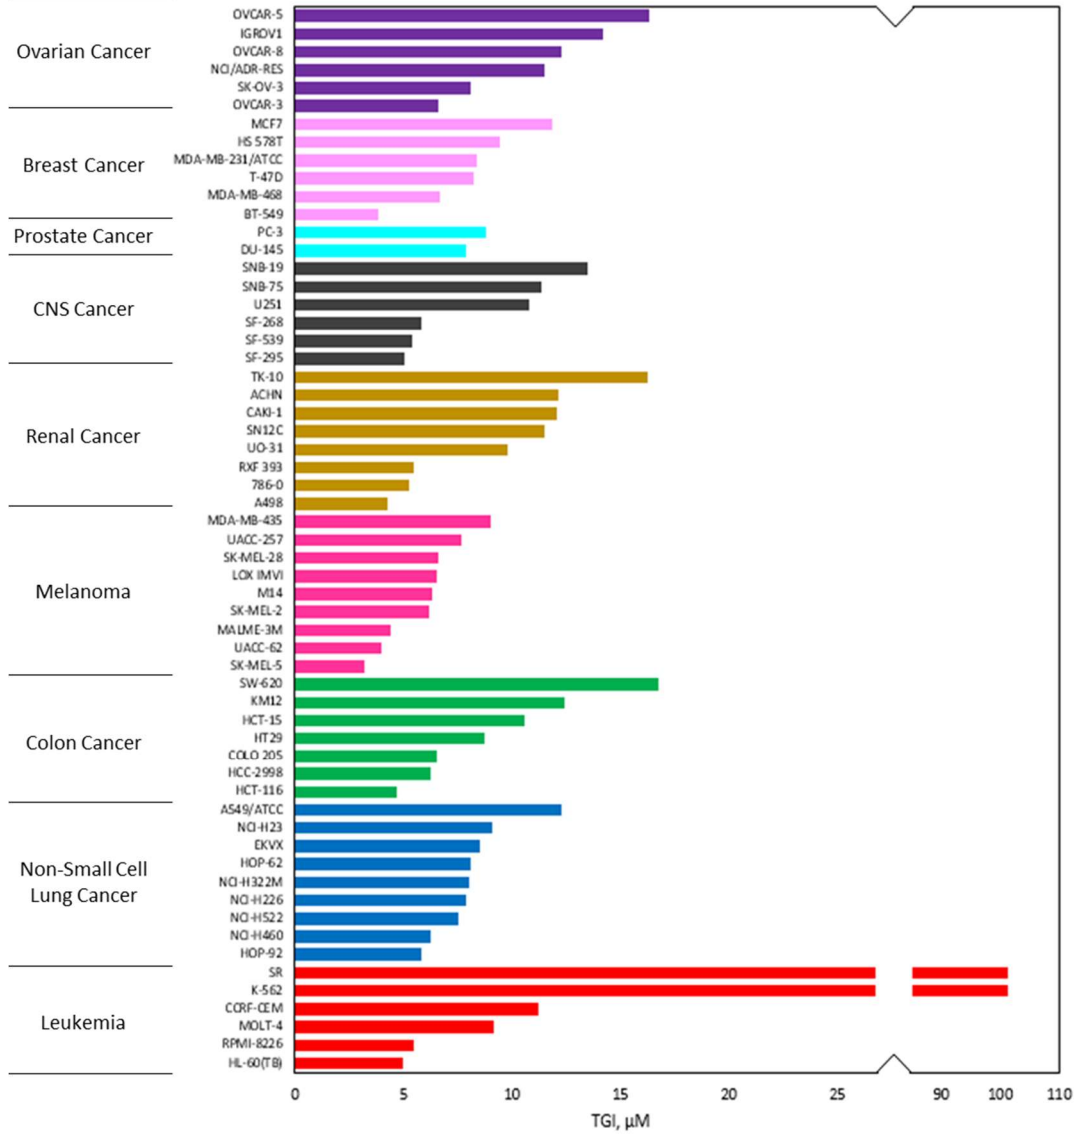

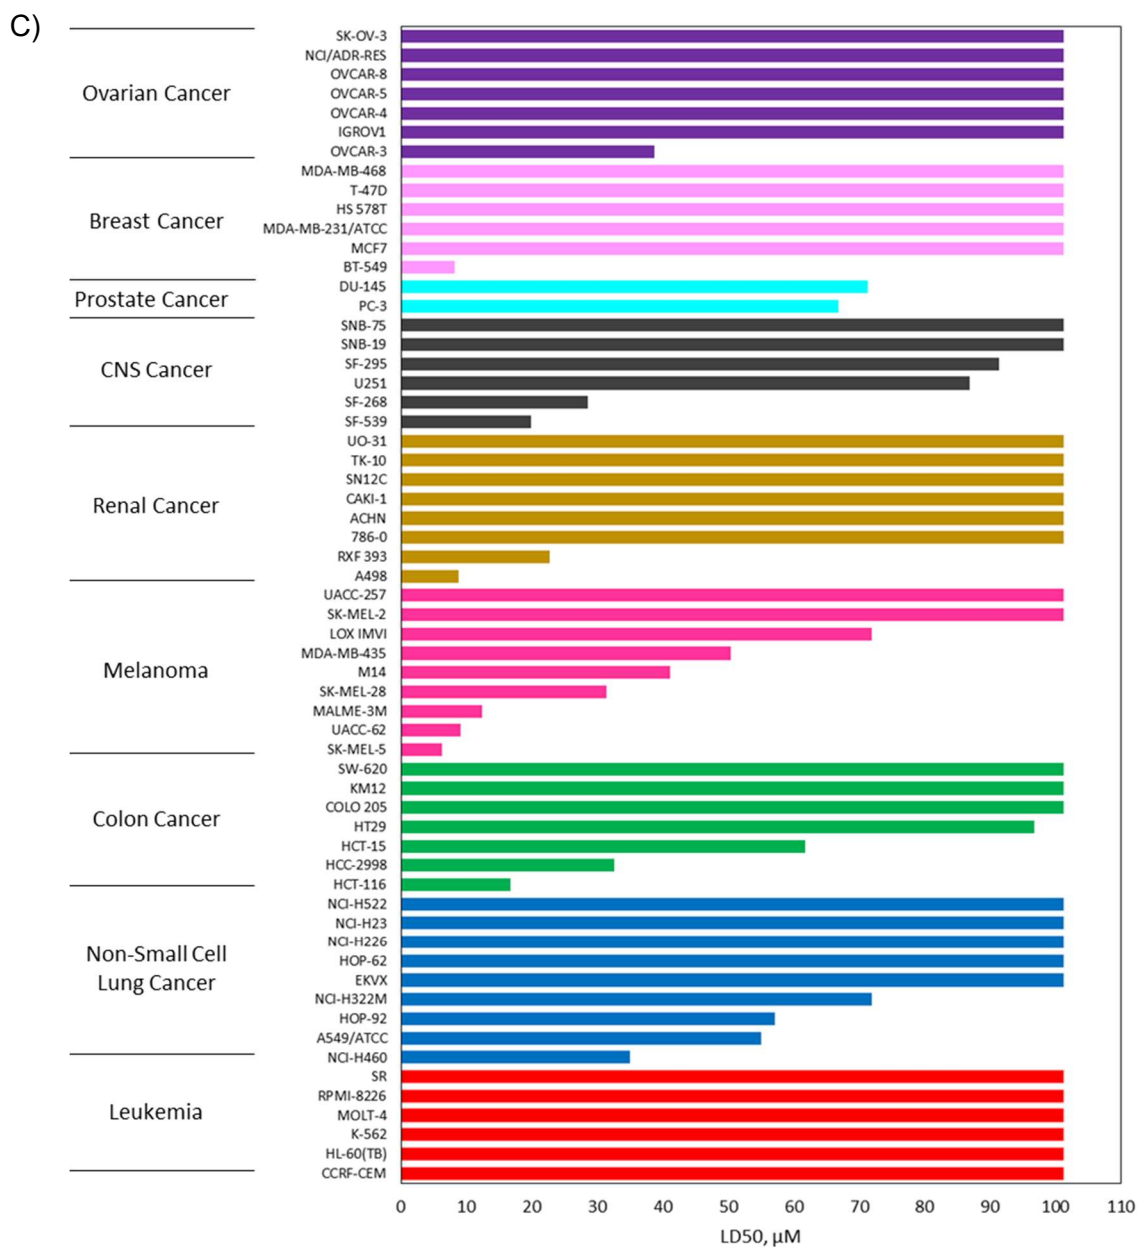

**Figure S3.** Waterfall plot of the A) GI50, B) TGI, and C) LC50 of 7-*epi*-clusianone for 60 cell lines as determined by the NCI-60 five dose screening assay. The tissue type of each cell line is denoted by color (Purple – Ovarian Cancer, Pale pink – Breast Cancer, Aqua – Prostate Cancer, Grey – CNS cancer, Gold – Renal Cancer, Bright Pink – Melanoma, Green – Colon Cancer, Blue – Non-small cell lung cancer, Red – Leukemia). The GI50, TGI, and LC50 was set to 100 µM if the true concentration was higher than what was tested in the five dose screen.



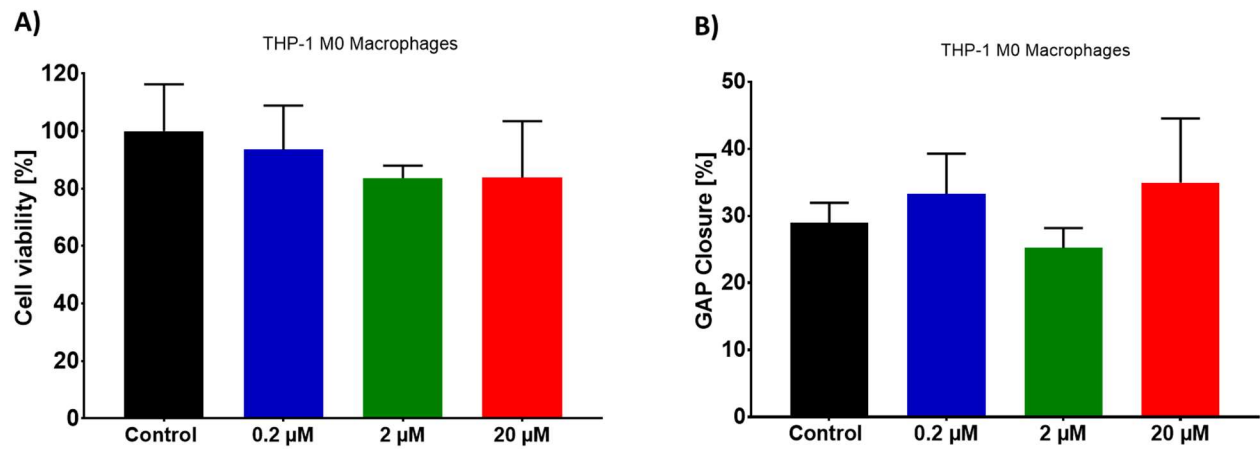

**Figure S4.** The effect *7-epi-clusianone* on A) the viability of THP-1 macrophages, as determined by the MTS assay, after 72 hours of exposure to a vehicle control or 0.2, 2, or 20 μM of *7-epi-clusianone*, and B) the percent wound closure of THP-1 macrophages into a cell-free gap after 24-hour exposure to a vehicle control or 0.2, 2, or 20 μM of *7-epi-clusianone*.

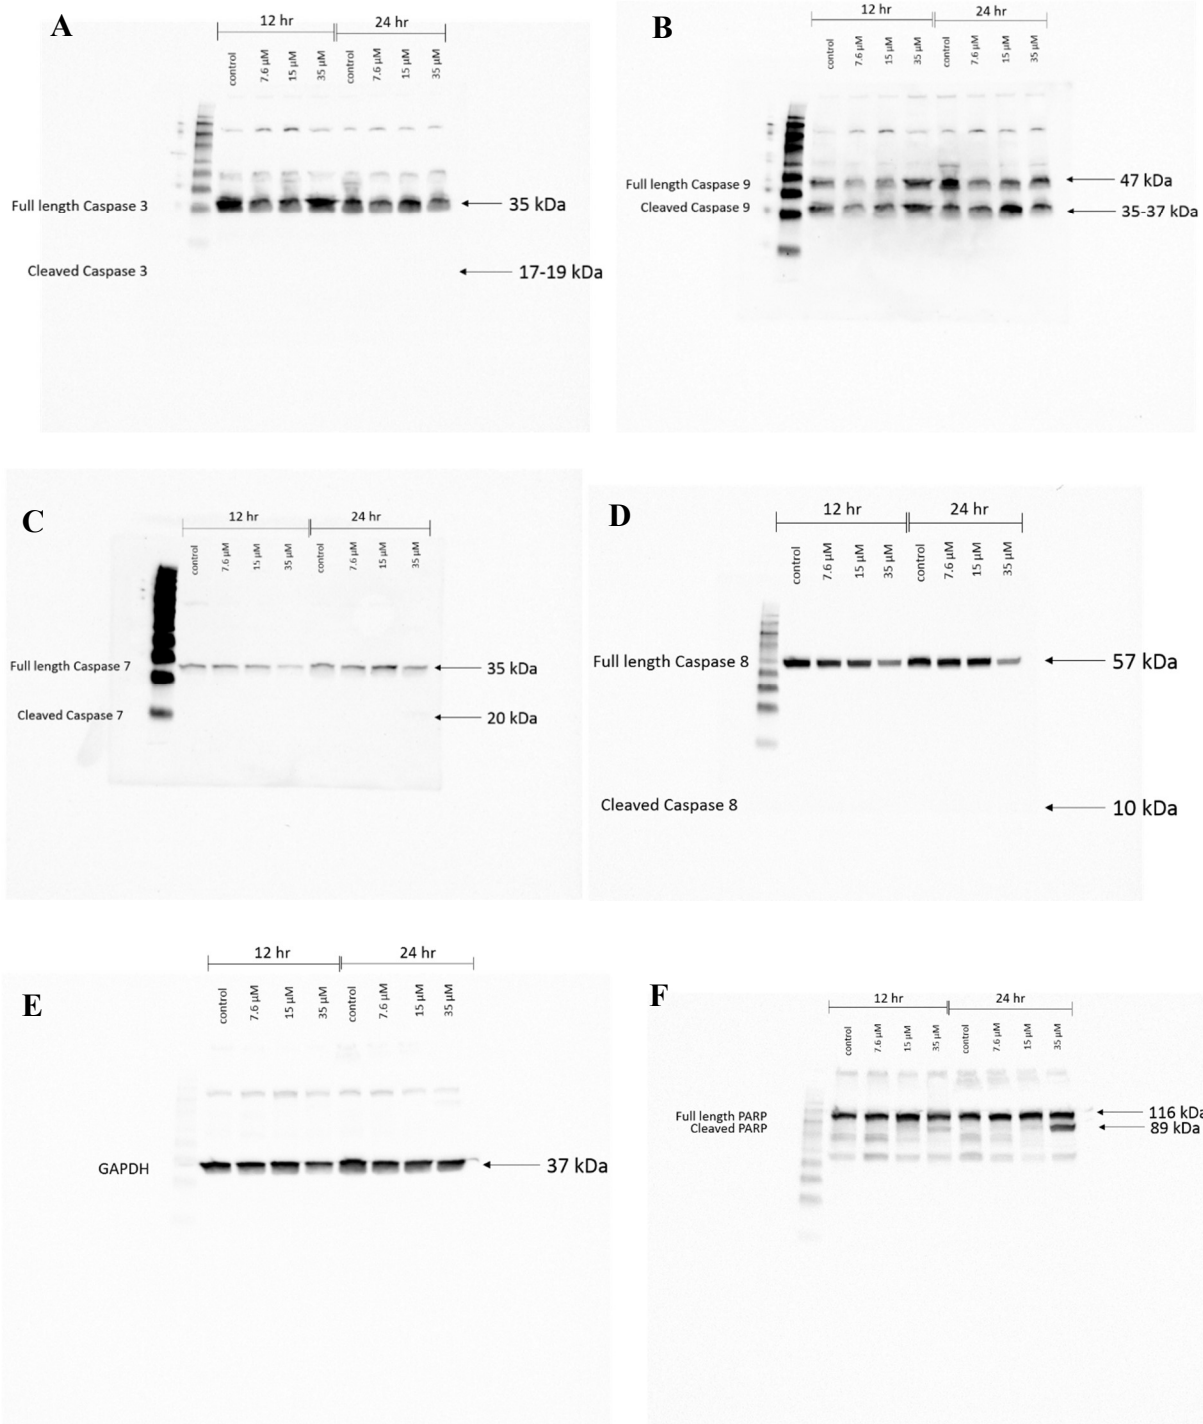

**Figure S5.** Samples were processed and western blotted for the expression of Caspase 3 (A), Caspase 9 (B), Caspase 7 (C), Caspase 8 (D), PARP (E), and GAPDH (F). Images were taken from the same sample run in duplicates and 2 different gels. The contrast and brightness of the images were adjusted using Image Lab software from Bio-Rad.

**Table S1.** Percent growth of the 60 cell lines examined in the NCI-60 five dose screening method.

The cancer cell lines are organized by tissue type.

| <b>Leukemia (% Growth)</b>  |      |      |      |      |      |
|-----------------------------|------|------|------|------|------|
| <b>CCRF-CEM</b>             | 103  | 102  | 103  |      | -7   |
| <b>HL-60 (TB)</b>           | 94   | 94   | 95   | -43  | -38  |
| <b>K-562</b>                | 98   | 91   | 96   | 10   | 15   |
| <b>MOLT-4</b>               | 95   | 96   | 89   | -4   | -1   |
| <b>RPMI-8226</b>            | 96   | 101  | 90   | -33  | -34  |
| <b>SR</b>                   | 94   | 99   | 100  | 5    | 1    |
| <b>Concentration (logM)</b> | -8.0 | -7.0 | -6.0 | -5.0 | -4.0 |

| <b>Non-Small Cell Lung Cancer (% Growth)</b> |      |      |      |      |      |
|----------------------------------------------|------|------|------|------|------|
| <b>A549/ATCC</b>                             | 96   | 103  | 101  | 6    | -70  |
| <b>EKVX</b>                                  | 87   | 90   | 85   | -7   | -34  |
| <b>HOP-62</b>                                | 92   | 95   | 96   | -10  | -44  |
| <b>HOP-92</b>                                | 98   | 102  | 89   | -29  | -57  |
| <b>NCI-H226</b>                              | 98   | 104  | 96   | -12  | -44  |
| <b>NCI-H23</b>                               | 96   | 95   | 92   | -5   | -36  |
| <b>NCI-H322M</b>                             | 96   | 94   | 94   | -10  | -57  |
| <b>NCI-H460</b>                              | 107  | 110  | 103  | -28  | -69  |
| <b>NCI-H522</b>                              | 93   | 86   | 81   | -12  | -21  |
| <b>Concentration (logM)</b>                  | -8.0 | -7.0 | -6.0 | -5.0 | -4.0 |

| <b>Colon Cancer (% Growth)</b> |      |      |      |      |      |
|--------------------------------|------|------|------|------|------|
| <b>COLO 205</b>                | 97   | 98   | 94   | -22  | -42  |
| <b>HCC-2998</b>                | 94   | 103  | 97   | -26  | -73  |
| <b>HCT-116</b>                 | 92   | 94   | 87   | -44  | -71  |
| <b>HCT-15</b>                  | 94   | 97   | 90   | 1    | -64  |
| <b>HT29</b>                    | 98   | 97   | 97   | -7   | -51  |
| <b>KM12</b>                    | 100  | 101  | 99   | 4    | -40  |
| <b>SW-620</b>                  | 106  | 106  | 104  | 12   | -41  |
| <b>Concentration (logM)</b>    | -8.0 | -7.0 | -6.0 | -5.0 | -4.0 |

| <b>CNS Cancer (% Growth)</b> |      |      |      |      |      |
|------------------------------|------|------|------|------|------|
| <b>SF-268</b>                | 97   | 95   | 94   | -29  | -75  |
| <b>SF-295</b>                | 85   | 91   | 89   | -39  | -51  |
| <b>SF-539</b>                | 88   | 93   | 99   | -38  | -80  |
| <b>SNB-19</b>                | 98   | 104  | 100  | 3    | -20  |
| <b>SNB-75</b>                | 72   | 79   | 75   | 3    | -48  |
| <b>U251</b>                  | 106  | 104  | 102  | 2    | -54  |
| <b>Concentration (logM)</b>  | -8.0 | -7.0 | -6.0 | -5.0 | -4.0 |

| <b>Melanoma (% Growth)</b>  |      |      |      |      |      |
|-----------------------------|------|------|------|------|------|
| <b>LOX IMVI</b>             | 95   | 96   | 96   | -22  | -55  |
| <b>MALME-3M</b>             | 89   | 95   | 83   | -47  | -79  |
| <b>M14</b>                  | 90   | 95   | 90   | -23  | -67  |
| <b>MDA-MB-435</b>           | 92   | 96   | 95   | -5   | -70  |
| <b>SK-MEL-2</b>             | 93   | 92   | 82   | -23  | -38  |
| <b>SK-MEL-28</b>            | 90   | 95   | 92   | -21  | -80  |
| <b>SK-MEL-5</b>             | 94   | 96   | 85   | -86  | -92  |
| <b>UACC-257</b>             | 100  | 108  | 102  | -14  | -32  |
| <b>UACC-62</b>              | 96   | 96   | 85   | -57  | -73  |
| <b>Concentration (logM)</b> | -8.0 | -7.0 | -6.0 | -5.0 | -4.0 |

| <b>Ovarian Cancer (% Growth)</b> |      |      |      |      |      |
|----------------------------------|------|------|------|------|------|
| <b>IGROV1</b>                    | 102  | 98   | 97   | 6    | -33  |
| <b>OVCAR-3</b>                   | 103  | 100  | 97   | -22  | -70  |
| <b>OVCAR-4</b>                   | 89   | 99   | 80   | -9   | 5    |
| <b>OVCAR-5</b>                   | 88   | 91   | 87   | 10   | -37  |
| <b>OVCAR-8</b>                   | 107  | 106  | 106  | 1    | -8   |
| <b>NCI/ADR-RES</b>               | 100  | 99   | 99   | 2    | -31  |
| <b>SK-OV-3</b>                   | 95   | 100  | 99   | -11  | -8   |
| <b>Concentration (logM)</b>      | -8.0 | -7.0 | -6.0 | -5.0 | -4.0 |

| <b>Renal Cancer (% Growth)</b> |      |      |      |      |      |
|--------------------------------|------|------|------|------|------|
| <b>786-0</b>                   | 86   | 93   | 83   | -33  | -38  |
| <b>A498</b>                    | 100  | 103  | 98   | -60  | -51  |
| <b>ACHN</b>                    | 93   | 99   | 93   | 1    | -13  |
| <b>CAKI-1</b>                  | 88   | 93   | 92   | 3    | -37  |
| <b>RXF 393</b>                 | 101  | 101  | 97   | -35  | -77  |
| <b>SN12C</b>                   | 101  | 99   | 96   | 2    | -31  |
| <b>TK-10</b>                   | 92   | 88   | 93   | 5    | -21  |
| <b>UO-31</b>                   | 88   | 88   | 85   | -1   | -18  |
| <b>Concentration (logM)</b>    | -8.0 | -7.0 | -6.0 | -5.0 | -4.0 |

| <b>Prostate Cancer (% Growth)</b> |      |      |      |      |      |
|-----------------------------------|------|------|------|------|------|
| <b>PC-3</b>                       | 93   | 94   | 88   | -6   | -60  |
| <b>DU-145</b>                     | 100  | 100  | 97   | -12  | -57  |
| <b>Concentration (logM)</b>       | -8.0 | -7.0 | -6.0 | -5.0 | -4.0 |

| <b>Breast Cancer (% Growth)</b> |      |      |      |      |      |
|---------------------------------|------|------|------|------|------|
| <b>MCF7</b>                     | 86   | 88   | 88   | 1    | -11  |
| <b>MDA-MB-231/ATCC</b>          | 102  | 110  | 103  | -9   | -42  |
| <b>HS 578T</b>                  | 101  | 106  | 105  | -3   | -18  |
| <b>BT-549</b>                   | 94   | 100  | 88   | -64  | -80  |
| <b>T-47D</b>                    | 79   | 89   | 85   | -8   | -14  |
| <b>MDA-MB-468</b>               | 99   | 100  | 96   | -21  | -44  |
| <b>Concentration (logM)</b>     | -8.0 | -7.0 | -6.0 | -5.0 | -4.0 |

**Table S2.** Inhibition of 135 tyrosine kinases treated with 20  $\mu$ M of 7-*epi*-clusianone determine using the DiscoverX scanTK kinase panel. The panel uses an active site-directed competition assay, which does not require the use of ATP to assess kinase function. Data is presented as a percentage of function after treatment as compared to a vehicle control. A kinase with a remaining function of 30% or less is considered to be significantly inhibited. The significantly inhibited kinases, JAK3 and ALK (C1156Y), are highlighted.

| Target                        | Clusianone       | Target                    | Clusianone       |
|-------------------------------|------------------|---------------------------|------------------|
| Gene Symbol                   | %Ctrl 20 $\mu$ M | Gene Symbol               | %Ctrl 20 $\mu$ M |
| ABL1(E255K)-phosphorylated    | 86               | CSF1R-autoinhibited       | 64               |
| ABL1(F317I)-nonphosphorylated | 58               | CSK                       | 96               |
| ABL1(F317I)-phosphorylated    | 66               | CTK                       | 87               |
| ABL1(F317L)-nonphosphorylated | 98               | DDR1                      | 86               |
| ABL1(F317L)-phosphorylated    | 73               | DDR2                      | 61               |
| ABL1(H396P)-nonphosphorylated | 71               | EGFR                      | 88               |
| ABL1(H396P)-phosphorylated    | 80               | EGFR(E746-A750del)        | 88               |
| ABL1(M351T)-phosphorylated    | 65               | EGFR(G719C)               | 97               |
| ABL1(Q252H)-nonphosphorylated | 84               | EGFR(G719S)               | 98               |
| ABL1(Q252H)-phosphorylated    | 87               | EGFR(L747-E749del, A750P) | 90               |
| ABL1(T315I)-nonphosphorylated | 53               | EGFR(L747-S752del, P753S) | 70               |
| ABL1(T315I)-phosphorylated    | 69               | EGFR(L747-T751del,Sins)   | 96               |
| ABL1(Y253F)-phosphorylated    | 79               | EGFR(L858R)               | 95               |
| ABL1-nonphosphorylated        | 80               | EGFR(L858R,T790M)         | 71               |
| ABL1-phosphorylated           | 88               | EGFR(L861Q)               | 97               |
| ABL2                          | 100              | EGFR(S752-I759del)        | 93               |
| ALK                           | 68               | EGFR(T790M)               | 72               |
| ALK(C1156Y)                   | 30               | EPHA1                     | 100              |
| ALK(L1196M)                   | 41               | EPHA2                     | 82               |
| AXL                           | 80               | EPHA3                     | 94               |
| BLK                           | 95               | EPHA7                     | 99               |
| BMX                           | 98               | EPHA8                     | 100              |
| BRK                           | 92               | EPHB1                     | 97               |
| BTK                           | 70               | EPHB2                     | 89               |

| Target                        | Clusianone | Target                        | Clusianone |
|-------------------------------|------------|-------------------------------|------------|
| Gene Symbol                   | %Ctrl 20µM | Gene Symbol                   | %Ctrl 20µM |
| EPHB4                         | 92         | KIT(D816V)                    | 80         |
| EPHB6                         | 69         | KIT(L576P)                    | 73         |
| ERBB2                         | 59         | KIT(V559D)                    | 80         |
| ERBB3                         | 93         | KIT(V559D,T670I)              | 85         |
| ERBB4                         | 100        | KIT(V559D,V654A)              | 97         |
| FAK                           | 85         | KIT-autoinhibited             | 78         |
| FER 5                         | 97         | LCK                           | 100        |
| FES 9                         | 92         | LTK                           | 70         |
| FGFR1                         | 100        | LYN                           | 84         |
| FGFR2                         | 90         | MERTK                         | 87         |
| FGFR3                         | 94         | MET                           | 86         |
| FGFR3(G697C)                  | 100        | MET(M1250T)                   | 92         |
| FGFR4                         | 85         | MET(Y1235D)                   | 76         |
| FGR 7                         | 85         | MST1R                         | 94         |
| FLT1                          | 90         | MUSK                          | 95         |
| FLT3                          | 100        | PDGFRA                        | 46         |
| FLT3(D835H)                   | 100        | PDGFRB                        | 69         |
| FLT3(D835V)                   | 89         | PYK2                          | 91         |
| FLT3(D835Y)                   | 87         | RET                           | 83         |
| FLT3(ITD)                     | 88         | RET(M918T)                    | 100        |
| FLT3(ITD,D835V)               | 87         | RET(V804L)                    | 100        |
| FLT3(ITD,F691L)               | 82         | RET(V804M)                    | 97         |
| FLT3(K663Q)                   | 90         | ROS1                          | 68         |
| FLT3(N841I)                   | 100        | SRC                           | 90         |
| FLT3(R834Q)                   | 60         | SRMS                          | 73         |
| FLT3-autoinhibited            | 45         | SYK                           | 97         |
| FLT4                          | 99         | TEC                           | 100        |
| FRK                           | 96         | TIE1                          | 100        |
| FYN                           | 98         | TIE2                          | 95         |
| HCK                           | 97         | TNK1                          | 97         |
| IGF1R                         | 83         | TNK2                          | 96         |
| INSR                          | 71         | TRKA                          | 93         |
| INSRR                         | 99         | TRKB                          | 54         |
| ITK                           | 100        | TRKC                          | 100        |
| JAK1(JH1 domain-catalytic)    | 75         | TXK                           | 95         |
| JAK1(JH2 domain-pseudokinase) | 87         | TYK2(JH1 domain-catalytic)    | 83         |
| JAK2(JH1 domain-catalytic)    | 76         | TYK2(JH2 domain-pseudokinase) | 92         |
| JAK3(JH1 domain-catalytic)    | 25         | TYRO3                         | 96         |
| KIT                           | 76         | VEGFR2                        | 58         |
| KIT(A829P)                    | 86         | YES                           | 85         |
| KIT(D816H)                    | 96         | ZAP70                         | 78         |

**Table S3.** Primers used for quantitative real-time polymerase chain reaction.

| <b>Gene</b>  | <b>5'-3' primer sequences: (F: forward R: reverse)</b> |
|--------------|--------------------------------------------------------|
| TNF $\alpha$ | F: CTG CTG CAC TTT GGA GTG AT                          |
|              | R: AGA TGA TCT GAC TGC CTG GG                          |
| IL-6         | F: AGC CAC TCA CCT CTT CAG AAC                         |
|              | R: GCC TCT TTG CTG CTT TCA CAC                         |
| GAPDH        | F: GTG GAC CTG ACC TGC CGT CT                          |
|              | R: GGA GGA GTG GGT GTC GCT GT                          |
